# Supplementary material for: Macrophage Plasticity and Function in the Lung Tumour Microenvironment Revealed in 3D Heterotypic Spheroid and Explant Models
Source: PubMed Central journal article supplement (PMC7999110; doi:10.3390/biomedicines9030302), 2021-03-15
Supplement: biomedicines-09-00302-s001.pdf [file biomedicines-09-00302-s001.pdf]

## **Supplementary Materials**

### **Macrophage plasticity and function in the lung tumour microenvironment revealed in 3D heterotypic spheroid and explant models**

#### **Authors**

Lauren Evans<sup>1\*</sup>, Kate Milward<sup>1\*</sup>, Richard Attanoos<sup>2,3</sup>, Aled Clayton<sup>1</sup>, Rachel Errington<sup>1</sup>, Zsuzsanna Tabi<sup>1</sup>

#### **Affiliations**

<sup>1</sup>Tissue MicroEnvironment Group, Division of Cancer and Genetics, School of Medicine, Cardiff University, Tenovus Building, University Hospital of Wales, Heath Park, Cardiff, CF14 4XN, UK.

<sup>2</sup>School of Medicine, Cardiff University, University Hospital of Wales, Heath Park, Cardiff, CF14 4XN, UK.

<sup>3</sup>Department of Cellular Pathology, University Hospital of Wales, Heath Park, Cardiff, CF14 4XN, UK.

\*Correspondence: Lauren.evans@crick.ac.uk (L.E.); Tel.: +44 (0) 29206 87342; Milwardk@cardiff.ac.uk (K.M.); Tel.: +44 (0) 29206 87342

**TABLE S1.** The mean fluorescence intensity (MFI, A.U.) values for CD64, CD163, and CD206 for each arm of the NSCLC M $\phi$  polarisation experiments. Table shows the mean marker expression and standard error of the mean (SEM) values for all independent experiments performed in the (A) multi-component spheroid model and (B) patient explant model.

**A**

| n = 3            | MFI (A.U.) |        |        |        |         |         |
|------------------|------------|--------|--------|--------|---------|---------|
|                  | CD64       |        | CD163  |        | CD206   |         |
|                  | Mean       | SEM    | Mean   | SEM    | Mean    | SEM     |
| <b>T = 0</b>     | 7770.5     | 4067.5 | 348.6  | 385.6  | 289.4   | 115.1   |
| <b>H522</b>      | 233.5      | 117.6  | 210.2  | 46.7   | 5777.8  | 2287.3  |
| <b>AGFG</b>      | 381.2      | 89.4   | 389.8  | 91.9   | 10875.0 | 4186.5  |
| <b>H522/AGFB</b> | 305.0      | 121.5  | 220.1  | 245.4  | 5582.6  | 2008.9  |
| <b>M1</b>        | 4782.8     | 645.4  | 101.7  | 133.4  | 1545.1  | 1144.6  |
| <b>M2</b>        | 334.1      | 42.1   | 1799.8 | 1139.9 | 24820.0 | 10777.0 |
| <b>Media</b>     | 520.1      | 165.3  | 1785.5 | 1118.7 | 3384.3  | 1593.7  |

**B**

| n = 5                              | MFI (A.U.) |        |        |       |        |       |
|------------------------------------|------------|--------|--------|-------|--------|-------|
|                                    | CD64       |        | CD163  |       | CD206  |       |
|                                    | Mean       | SEM    | Mean   | SEM   | Mean   | SEM   |
| <b>T = 0</b>                       | 1008.8     | 225.7  | 1170.2 | 427.2 | 119.7  | 147.4 |
| <b>Explants (TAMs)</b>             | -878.7     | 1825.9 | 1175.5 | 709.2 | 1130.5 | 583.7 |
| <b>Explants/M<math>\phi</math></b> | 438.8      | 406.0  | -349.8 | 712.9 | 1576.0 | 778.0 |
| <b>M1</b>                          | 2911.9     | 970.5  | 310.0  | 413.7 | 353.8  | 214.0 |
| <b>M2</b>                          | 844.7      | 346.8  | 356.0  | 319.5 | 715.0  | 223.0 |
| <b>Media</b>                       | 362.3      | 430.6  | 335.1  | 309.9 | 267.2  | 154.0 |

**TABLE S2.** The epitope sequence of each antigen used in the T cell suppression assays are shown, alongside the pathogen source and antigen reference for each peptide. The Immune Epitope Database (IEDB) was used to predict epitope sequences for the most common HLA (MHC-I and MHC-II) alleles from viral (or bacterial; TT) antigens. Epstein-Barr virus, EBV; Human cytomegalovirus, HCMV; Tetanus toxoid, TT.

| <b>HLA restriction</b> | <b>Epitope sequence</b> | <b>Antigen reference</b>     |
|------------------------|-------------------------|------------------------------|
| A*01:01                | CTELKLSDY               | Influenza A (PR8) NP 44-52   |
| A*01:01                | VSDGGPNLY               | Influenza A PB1 591-599      |
| A*02:01                | GILGFVFTL               | Influenza A MP 58-66         |
| A*02:01                | NLVPMVATV               | HCMV pp65 495-504            |
| A*02:01                | FLYALALLL               | EBV LMP-2 356-364            |
| A*03:01                | ILRGSVAHK               | Influenza A (PR8) NP 265-274 |
| A*03:01                | RLRAEAQVK               | EBV EBNA 3A 603-611          |
| A*11:01                | ATIGTAMYK               | EBV BRLF1 134-142            |
| A*33; A*50             | LQHYREVAAAK             | EBV BZLF1 197-208            |
| B*07:02                | QPEWFRNVL               | Influenza A PB1 329-337      |
| B*07:02                | QPRAPIRPI               | EBV EBNA-3C 881-889          |
| B*07:02                | TPRVTTGGAM              | HCMV pp65 418-427            |
| B*08:01                | RAKFKQLL                | EBV BZLF1 190-197            |
| B*08:01                | QAKWRLQTL               | EBV EBNA-3A 158-166          |
| B44                    | EFFWDANDIY              | HCMV pp65 512-521            |
| B*44:05                | EENLLDFVRF              | EBV EBNA 3C 281-290          |
| DRB1*01:01             | TSLYNLRRTALA            | EBV EBNA1 15-527             |
| DRB1*07:01             | EPDVYYTSAFVFPTK         | HCMV pp65 177-191            |
| DRB1*15:01             | MSIYVYALPLKMLNI         | HCMV pp65 109-123            |
| DRB1*04:01             | AEGLRALLARSHVER         | EBV EBNA1 482-496            |
| DRB1*01:01             | PKYVKQNTLKLAT           | Influenza A HA1 307-319      |
| DRB1*07:01             | PDDYSNTHSTRYVTV         | HCMV gB 215-229              |
| DRB1*11:01             | VSIDKFRIFCKALNPK        | TT 1084-1099                 |
| MULTIPLE               | AAFEDLRVLSFIKGTK        | Influenza A NP 336-351       |

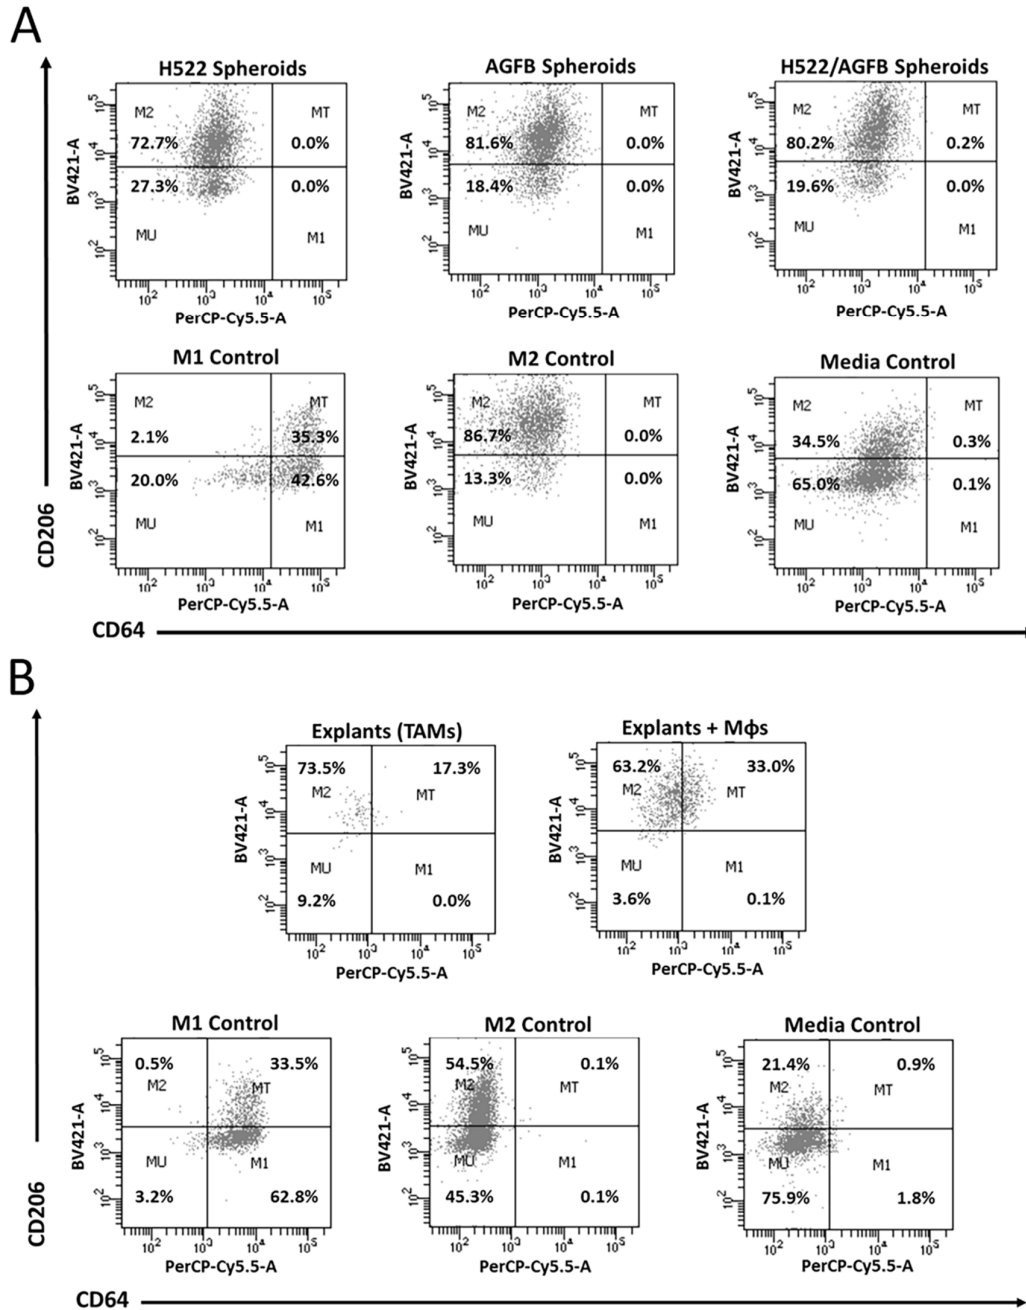

**FIGURE S1.** CD206<sup>hi/lo</sup>CD64<sup>hi/lo</sup> quadrant (two-marker) flow cytometry gating denoting unpolarised myeloid cells (MU), M1-like Mφs, M2-like Mφs, and transitional myeloid cell (MT) populations for all culture conditions in the (A) spheroid- and (B) explant-mediated Mφ polarisation experiments. Two-marker analysis results are given as a percentage of parent (live CD14<sup>+</sup>) cells.

**TABLE S3. (A)** The mean fluorescence intensity (MFI, A.U.) values for IL-12p70, IL-12p40, IL-6, IL-1 $\beta$ , IL-23, CXCL10, IL-4, CCL17, and IL-1RA for each arm of the explant-mediated soluble factor secretion experiments. Table shows the mean MFI and standard error of the mean (SEM) values for each of the 4 patient (4898, 4836, 2780, and 5178) experiments. **(B)** The mean concentration (pg/ml) of each target present in T cell co-culture supernatants was determined using individual protein standards for each of the 4 patient experiments.

**A**

| <b>Cytokine/chemokine MFI (A.U.)</b> |             |             |             |             |                                  |
|--------------------------------------|-------------|-------------|-------------|-------------|----------------------------------|
| <b>IL-12p70</b>                      |             |             |             |             |                                  |
|                                      | <b>4898</b> | <b>4836</b> | <b>2780</b> | <b>5178</b> | <b>Mean <math>\pm</math> SEM</b> |
| <b>T cells Only</b>                  | 40.54       | 56.96       | 46.70       | 55.94       | 50.03 $\pm$ 3.92                 |
| <b>+ Explants</b>                    | 40.54       | 64.15       | 102.12      | 50.29       | 64.27 $\pm$ 13.51                |
| <b>+ Explants/M<math>\phi</math></b> | 44.65       | 52.86       | 53.37       | 83.13       | 58.50 $\pm$ 8.45                 |
| <b>IL-12p40</b>                      |             |             |             |             |                                  |
|                                      | <b>4898</b> | <b>4836</b> | <b>2780</b> | <b>5178</b> | <b>Mean <math>\pm</math> SEM</b> |
| <b>T cells Only</b>                  | 52.34       | 54.39       | 51.31       | 79.54       | 39.39 $\pm$ 6.74                 |
| <b>+ Explants</b>                    | 47.73       | 56.45       | 54.40       | 55.42       | 53.50 $\pm$ 1.97                 |
| <b>+ Explants/M<math>\phi</math></b> | 52.86       | 55.94       | 51.31       | 70.82       | 57.73 $\pm$ 4.47                 |
| <b>IL-6</b>                          |             |             |             |             |                                  |
|                                      | <b>4898</b> | <b>4836</b> | <b>2780</b> | <b>5178</b> | <b>Mean <math>\pm</math> SEM</b> |
| <b>T cells Only</b>                  | 5711.50     | 15422.50    | 4286.00     | 17757.00    | 10794.25 $\pm$ 3392.30           |
| <b>+ Explants</b>                    | 95768.50    | 95570.00    | 104726.00   | 98811.00    | 98718.88 $\pm$ 2135.30           |
| <b>+ Explants/M<math>\phi</math></b> | 63339.00    | 98066.00    | 97617.50    | 99214.00    | 89559.13 $\pm$ 8746.50           |
| <b>IL-1<math>\beta</math></b>        |             |             |             |             |                                  |
|                                      | <b>4898</b> | <b>4836</b> | <b>2780</b> | <b>5178</b> | <b>Mean <math>\pm</math> SEM</b> |
| <b>T cells Only</b>                  | 61590.00    | 61730.00    | 55116.50    | 88211.00    | 66661.88 $\pm$ 7346.81           |
| <b>+ Explants</b>                    | 71586.00    | 66539.50    | 79306.00    | 88200.50    | 76408 $\pm$ 4579.07              |
| <b>+ Explants/M<math>\phi</math></b> | 69331.00    | 74208.00    | 79261.00    | 90690.50    | 78372.63 $\pm$ 4579.07           |
| <b>IL-23</b>                         |             |             |             |             |                                  |
|                                      | <b>4898</b> | <b>4836</b> | <b>2780</b> | <b>5178</b> | <b>Mean <math>\pm</math> SEM</b> |
| <b>T cells Only</b>                  | 84.16       | 81.59       | 83.13       | 87.24       | 84.03 $\pm$ 1.19                 |
| <b>+ Explants</b>                    | 80.56       | 88.78       | 84.67       | 84.67       | 84.67 $\pm$ 1.68                 |
| <b>+ Explants/M<math>\phi</math></b> | 87.75       | 85.70       | 84.16       | 92.37       | 87.49 $\pm$ 1.78                 |

| <b>CXCL10</b>        |             |             |             |             |                     |
|----------------------|-------------|-------------|-------------|-------------|---------------------|
|                      | <b>4898</b> | <b>4836</b> | <b>2780</b> | <b>5178</b> | <b>Mean ± SEM</b>   |
| <b>T cells Only</b>  | 793.34      | 18103.00    | 1643.50     | 15462.50    | 9000.58 ± 4,28.58   |
| <b>+ Explants</b>    | 12589.00    | 37647.50    | 88606.50    | 7113.50     | 36489.13 ± 18600.42 |
| <b>+ Explants/Mφ</b> | 967.89      | 45726.50    | 106449.00   | 60880.00    | 53505.85 ± 21752.61 |
| <b>IL-4</b>          |             |             |             |             |                     |
|                      | <b>4898</b> | <b>4836</b> | <b>2780</b> | <b>5178</b> | <b>Mean ± SEM</b>   |
| <b>T cells Only</b>  | 192.43      | 198.08      | 223.22      | 204.23      | 204.49 ± 6.69       |
| <b>+ Explants</b>    | 198.59      | 196.54      | 1,327.83    | 222.71      | 486.41 ± 280.53     |
| <b>+ Explants/Mφ</b> | 194.48      | 206.29      | 222.71      | 207.83      | 207.82 ± 5.79       |
| <b>CCL17</b>         |             |             |             |             |                     |
|                      | <b>4898</b> | <b>4836</b> | <b>2780</b> | <b>5178</b> | <b>Mean ± SEM</b>   |
| <b>T cells Only</b>  | 98.01       | 1019.26     | 129.83      | 478.77      | 431.47 ± 214.07     |
| <b>+ Explants</b>    | 546.50      | 1970.00     | 7159.00     | 912.61      | 2647.03 ± 1533.97   |
| <b>+ Explants/Mφ</b> | 138.04      | 3184.50     | 1563.73     | 1,534.00    | 1605.07 ± 622.73    |
| <b>IL-1RA</b>        |             |             |             |             |                     |
|                      | <b>4898</b> | <b>4836</b> | <b>2780</b> | <b>5178</b> | <b>Mean ± SEM</b>   |
| <b>T cells Only</b>  | 160.11      | 340.73      | 112.90      | 321.23      | 233.74 ± 57.10      |
| <b>+ Explants</b>    | 2030.50     | 6615.50     | 2855.00     | 1435.26     | 3234.06 ± 1164.12   |
| <b>+ Explants/Mφ</b> | 2674.58     | 7359.00     | 6259.50     | 2510.50     | 4700.89 ± 1238.23   |

**B**

| <b>Cytokines/chemokine concentration (pg/ml)</b> |             |             |             |             |
|--------------------------------------------------|-------------|-------------|-------------|-------------|
| <b>IL-12p70</b>                                  |             |             |             |             |
|                                                  | <b>4898</b> | <b>4836</b> | <b>2780</b> | <b>5178</b> |
| <b>T cells Only</b>                              | <0.50       | <0.50       | <0.50       | <0.50       |
| <b>+ Explants</b>                                | <0.50       | <0.50       | 0.64        | <0.50       |
| <b>+ Explants/Mφ</b>                             | <0.50       | <0.50       | <0.50       | <0.50       |
| <b>IL-12p40</b>                                  |             |             |             |             |
|                                                  | <b>4898</b> | <b>4836</b> | <b>2780</b> | <b>5178</b> |

|                      |             |             |             |             |
|----------------------|-------------|-------------|-------------|-------------|
| <b>T cells Only</b>  | <0.94       | <0.94       | <0.94       | 1.62        |
| <b>+ Explants</b>    | <0.94       | <0.94       | <0.94       | <0.94       |
| <b>+ Explants/Mφ</b> | <0.94       | <0.94       | <0.94       | 1.10        |
| <b>IL-6</b>          |             |             |             |             |
|                      | <b>4898</b> | <b>4836</b> | <b>2780</b> | <b>5178</b> |
| <b>T cells Only</b>  | 56.70       | 301.35      | 33.67       | 398.26      |
| <b>+ Explants</b>    | 17636.64    | 17525.41    | 23237.59    | 19318.45    |
| <b>+ Explants/Mφ</b> | 9692.70     | 18887.90    | 18673.50    | 19562.94    |
| <b>IL-1β</b>         |             |             |             |             |
|                      | <b>4898</b> | <b>4836</b> | <b>2780</b> | <b>5178</b> |
| <b>T cells Only</b>  | 4306.78     | 4281.39     | 3174.85     | 16134.15    |
| <b>+ Explants</b>    | 6814.84     | 5440.14     | 9906.45     | 16140.48    |
| <b>+ Explants/Mφ</b> | 6126.78     | 7803.59     | 10094.08    | 18697.51    |
| <b>IL-23</b>         |             |             |             |             |
|                      | <b>4898</b> | <b>4836</b> | <b>2780</b> | <b>5178</b> |
| <b>T cells Only</b>  | <0.66       | <0.66       | <0.66       | <0.66       |
| <b>+ Explants</b>    | <0.66       | 0.69        | <0.66       | <0.66       |
| <b>+ Explants/Mφ</b> | 0.69        | <0.66       | <0.66       | 1.12        |
| <b>CXCL10</b>        |             |             |             |             |
|                      | <b>4898</b> | <b>4836</b> | <b>2780</b> | <b>5178</b> |
| <b>T cells Only</b>  | 7.99        | 175.87      | 17.26       | 150.02      |
| <b>+ Explants</b>    | 124.65      | 570.79      | 1890.04     | 69.01       |
| <b>+ Explants/Mφ</b> | 9.98        | 577.67      | 3042.40     | 870.18      |
| <b>IL-4</b>          |             |             |             |             |
|                      | <b>4898</b> | <b>4836</b> | <b>2780</b> | <b>5178</b> |
| <b>T cells Only</b>  | <1.09       | <1.09       | 1.12        | <1.09       |
| <b>+ Explants</b>    | <1.09       | <1.09       | 48.8        | 1.44        |
| <b>+ Explants/Mφ</b> | <1.09       | <1.09       | 1.23        | <1.09       |
| <b>CCL17</b>         |             |             |             |             |

|                                      |             |             |             |             |
|--------------------------------------|-------------|-------------|-------------|-------------|
|                                      | <b>4898</b> | <b>4836</b> | <b>2780</b> | <b>5178</b> |
| <b>T cells Only</b>                  | 2.63        | 54.78       | 2.88        | 23.64       |
| <b>+ Explants</b>                    | 27.39       | 103.56      | 398.56      | 48.91       |
| <b>+ Explants/M<math>\phi</math></b> | 6.77        | 162.76      | 81.40       | 81.81       |
| <b>IL-1RA</b>                        |             |             |             |             |
|                                      | <b>4898</b> | <b>4836</b> | <b>2780</b> | <b>5178</b> |
| <b>T cells Only</b>                  | <2.22       | 2.60        | <2.22       | 3.10        |
| <b>+ Explants</b>                    | 9.63        | 27.91       | 11.98       | 7.48        |
| <b>+ Explants/M<math>\phi</math></b> | 10.89       | 35.48       | 23.52       | 11.08       |
